# Supplementary material for: Enhanced photocatalytic mechanism for the hybrid g-C3N4/MoS2 nanocomposite
Source: Royal Society of Chemistry journal article supplement (doi:10.1039/c4ta00275j), 2014-01-01
Supplement: c4ta00275j1.pdf [file c4ta00275j1.pdf]

## Supplementary information

### Enhanced Photocatalytic Mechanism for the Hybrid g-C<sub>3</sub>N<sub>4</sub>/MoS<sub>2</sub> Nanocomposite

Jiajun Wang,<sup>1</sup> Zhaoyong Guan,<sup>1</sup> Jing Huang,<sup>1,2</sup> Qunxiang Li,<sup>1,\*</sup> and Jinlong Yang<sup>1,3</sup>

<sup>1</sup>Hefei National Laboratory for Physical Sciences at the Microscale,  
University of Science and Technology of China, Hefei, Anhui 230026, China

<sup>2</sup>School of Materials and Chemical Engineering,  
Anhui Jianzhu University, Hefei, Anhui 230022, China

<sup>3</sup>Synergetic Innovation Center of Quantum Information and Quantum Physics,  
University of Science and Technology of China, Hefei, Anhui 230026, China

Email: [liqun@ustc.edu.cn](mailto:liqun@ustc.edu.cn)

When g-C<sub>3</sub>N<sub>4</sub>/MoS<sub>2</sub> nanocomposite is illuminated with light, the photogenerated electrons in g-C<sub>3</sub>N<sub>4</sub> layer can easily move to the CB of MoS<sub>2</sub> sheet due to the observed CBO, as shown in Fig. 4. At the same time, the polarized field between C<sub>3</sub>N<sub>4</sub> and MoS<sub>2</sub> sheets in the nanocomposite prevents the photogenerated electrons migrating from C<sub>3</sub>N<sub>4</sub> to MoS<sub>2</sub> sheet. Clearly, there is a competitive role in electron-hole separation between the band alignment and electric polarized field. To evaluate which one gives the dominative role in migration of the photogenerated electrons, we estimate their electric field strengths. The field strength (E) coming from the band alignment is estimated to be about  $2.8 \times 10^9$  V/m ( $E=U/d_0$ , U is the CBO,  $d_0$  is the separation between g-C<sub>3</sub>N<sub>4</sub> and MoS<sub>2</sub> sheets in the nanocomposite,  $U=0.83$  V,  $d_0=2.97 \times 10^{-10}$  m), which is about three times larger than the dipole-induced polarized field strength of  $9.8 \times 10^8$  V/m (here,  $E=P/\epsilon_r \epsilon_0 S d_0$ , P is the dipole and  $P=qd$ ,  $\epsilon_r$  is the relative dielectric constant,  $\epsilon_0$  is the permittivity of free space, S is the surface area of the nanocomposite,  $q=0.06$  e,  $d=2.0 \times 10^{-10}$  m,  $\epsilon_r=1.0$ ,  $\epsilon_0=8.85 \times 10^{-12}$  F/m,  $S=7.5 \times 10^{-19}$  m<sup>2</sup>,  $d_0=2.97 \times 10^{-10}$  m). This result indicates that the migration of photogenerated electrons in g-C<sub>3</sub>N<sub>4</sub>/MoS<sub>2</sub> nanocomposite is dominated by the strong driving force provided by the type II band alignment.

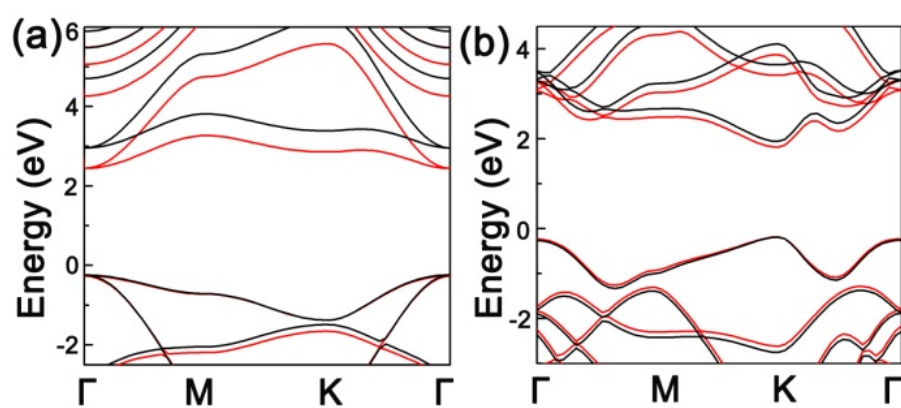

**Figure S1** The calculated band structures of isolated g-C<sub>3</sub>N<sub>4</sub> (a) and MoS<sub>2</sub> (b) sheets at the HSE06 level. The results of the Hartree-Fock exchange mixing parameter of 0.175 and 0.25 are plotted with the red and black lines, respectively.

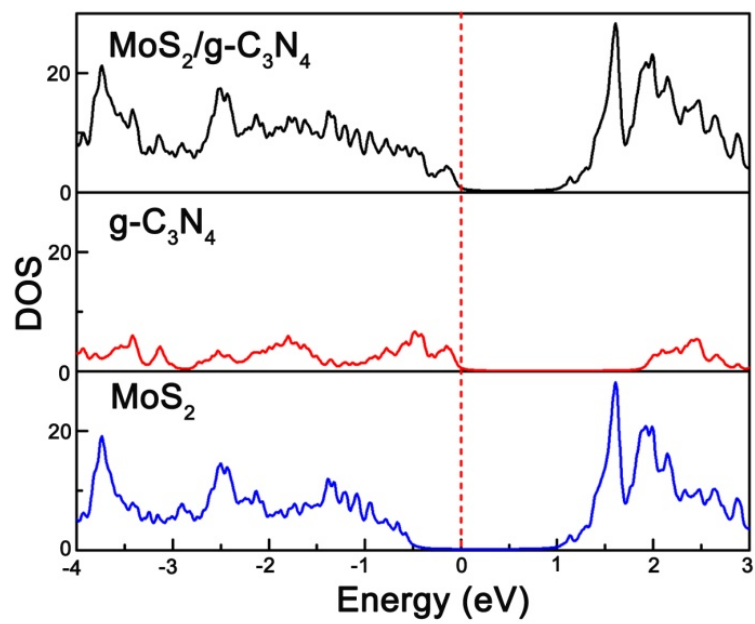

**Figure S2** The calculated TDOS and PDOS of  $\text{g-C}_3\text{N}_4/\text{MoS}_2$  nanocomposite at the PBE level.

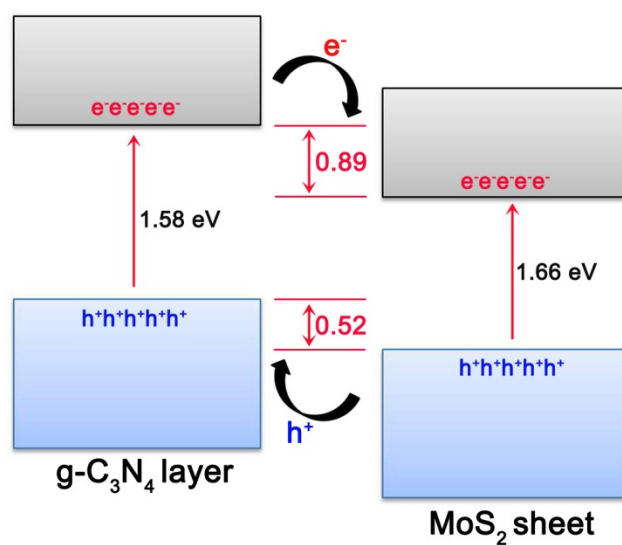

**Figure S3** Schematic illustration of the carriers transfer and separation in the proposed g-C<sub>3</sub>N<sub>4</sub>/MoS<sub>2</sub> nanocomposite at the PBE level.

INCAR input file for structure optimization, energy calculation, band and dos

```
SYSTEM = Mo S C N
PREC   = Normal
ISTART = 0   (1 for band and dos)
ICHARG = 2
ISPIN  = 1
ENCUT  = 520
NELM   = 60;  NELMIN= 6; NELMDL= -5
EDIFF  = 1E-5
LREAL  = Auto
ALGO   = Normal
EDIFFG = -1E-2
NSW    = 400   (0 for energy calculation, band and dos)
IBRION = 2     (-1 for energy calculation, band and dos )
ISIF   = 2
ISYM   = 0
POTIM  = 0.2
ISMEAR = 0   (-5 for energy calculation and dos )
SIGMA  = 0.05
LWAVE  = F
LCHARG = F
(LORBIT=11 for dos)
NWRITE = 1
#vdW
LVDW=.TRUE.
#HSE06
LHFCALC=.TRUE.
AEXX=0.175
AGGAX=0.825
PRECFOCK=Fast (Normal for energy calculation, band and dos )
IMIX=1
AMIX=0.2
```

Optimized geometries by employing PBE functional (9×9×1 k-points)

POSCAR

g-C3N4 monolayer

|           |          |           |
|-----------|----------|-----------|
| 1.000000  |          |           |
| 4.790000  | 0.000000 | 0.000000  |
| -2.395000 | 4.148262 | 0.000000  |
| 0.000000  | 0.000000 | 15.000000 |

3 4

Direct

|          |          |          |
|----------|----------|----------|
| 0.353083 | 0.176542 | 0.500000 |
| 0.823458 | 0.176542 | 0.500000 |
| 0.823459 | 0.646917 | 0.500000 |
| 0.000000 | 0.000000 | 0.500000 |
| 0.503635 | 0.496365 | 0.500000 |
| 0.503634 | 0.007269 | 0.500000 |
| 0.992731 | 0.496366 | 0.500000 |

Optimized geometries by employing PBE functional (13×13×1 k-points)

MoS2 sheet

|           |          |           |
|-----------|----------|-----------|
| 1.000000  |          |           |
| 3.190000  | 0.000000 | 0.000000  |
| -1.595000 | 2.762621 | 0.000000  |
| 0.000000  | 0.000000 | 15.000000 |

1 2

Direct

|          |          |          |
|----------|----------|----------|
| 0.666666 | 0.333334 | 0.501417 |
| 0.333333 | 0.666667 | 0.397078 |
| 0.333333 | 0.666667 | 0.605756 |

Optimized geometries by employing HSE06 hybrid functional (4×4×1 k-points)

POSCAR

g-C3N4 monolayer

```
1.000000
  4.790000    0.000000    0.000000
 -2.395000    4.148262    0.000000
  0.000000    0.000000   15.000000
```

3 4

Direct

```
0.353428    0.176714    0.500000
0.823286    0.176714    0.500000
0.823286    0.646572    0.500000
0.000000    0.000000    0.500000
0.504561    0.495440    0.500000
0.504559    0.009119    0.500000
0.990881    0.495441    0.500000
```

Optimized geometries by employing HSE06 hybrid functional (6×6×1 k-points)

POSCAR

MoS2 sheet

```
1.000000
  3.190000    0.000000    0.000000
 -1.595000    2.762621    0.000000
  0.000000    0.000000   15.000000
```

1 2

Direct

```
0.666666    0.333334    0.501417
0.333333    0.666667    0.398339
0.333333    0.666667    0.604495
```

Geometry optimization by employing PBE functional (2×2×1 k-points)

g-C3N4/MoS2 nanocomposite

POSCAR

Mo S C N

|           |          |           |  |
|-----------|----------|-----------|--|
| 1.000000  |          |           |  |
| 9.570000  | 0.000000 | 0.000000  |  |
| -4.785000 | 8.287863 | 0.000000  |  |
| 0.000000  | 0.000000 | 20.000000 |  |

9 18 12 16

Direct

|          |          |          |
|----------|----------|----------|
| 0.222180 | 0.111088 | 0.336690 |
| 0.555504 | 0.110998 | 0.337306 |
| 0.888912 | 0.111089 | 0.336691 |
| 0.222232 | 0.444446 | 0.337068 |
| 0.555504 | 0.444497 | 0.337307 |
| 0.889003 | 0.444497 | 0.337307 |
| 0.222227 | 0.777774 | 0.337066 |
| 0.555555 | 0.777769 | 0.337068 |
| 0.888913 | 0.777821 | 0.336690 |
| 0.111237 | 0.222470 | 0.258553 |
| 0.111021 | 0.222036 | 0.414492 |
| 0.444970 | 0.222482 | 0.259020 |
| 0.444127 | 0.222060 | 0.415307 |
| 0.777519 | 0.222482 | 0.259020 |
| 0.777938 | 0.222063 | 0.415308 |
| 0.110951 | 0.555472 | 0.259041 |
| 0.111443 | 0.555711 | 0.415452 |
| 0.444531 | 0.555470 | 0.259041 |
| 0.444285 | 0.555716 | 0.415454 |
| 0.777519 | 0.555031 | 0.259020 |
| 0.777941 | 0.555875 | 0.415307 |
| 0.111235 | 0.888766 | 0.258551 |
| 0.111022 | 0.888979 | 0.414490 |
| 0.444528 | 0.889050 | 0.259040 |
| 0.444290 | 0.888558 | 0.415452 |
| 0.777531 | 0.888764 | 0.258553 |
| 0.777965 | 0.888980 | 0.414492 |
| 0.179565 | 0.089788 | 0.564100 |
| 0.410645 | 0.087756 | 0.587343 |
| 0.410642 | 0.322901 | 0.587344 |
| 0.176039 | 0.588021 | 0.597070 |
| 0.411976 | 0.588021 | 0.597069 |
| 0.411980 | 0.823963 | 0.597073 |



|          |          |          |
|----------|----------|----------|
| 0.677098 | 0.589355 | 0.587344 |
| 0.912244 | 0.589353 | 0.587344 |
| 0.910210 | 0.820432 | 0.564100 |
| 0.677098 | 0.087748 | 0.587340 |
| 0.910216 | 0.089784 | 0.564098 |
| 0.912253 | 0.322902 | 0.587340 |
| 0.999997 | 0.000000 | 0.560126 |
| 0.257999 | 0.250957 | 0.565438 |
| 0.258006 | 0.007051 | 0.565434 |
| 0.485652 | 0.242829 | 0.606236 |
| 0.999867 | 0.499935 | 0.591768 |
| 0.251212 | 0.748788 | 0.598849 |
| 0.251211 | 0.502439 | 0.598838 |
| 0.497564 | 0.748795 | 0.598850 |
| 0.500062 | 0.499939 | 0.591768 |
| 0.749040 | 0.741998 | 0.565436 |
| 0.757170 | 0.514346 | 0.606237 |
| 0.992947 | 0.741995 | 0.565436 |
| 0.500064 | 0.000135 | 0.591769 |
| 0.757170 | 0.242827 | 0.606233 |
| 0.749036 | 0.007047 | 0.565432 |
| 0.992950 | 0.250959 | 0.565435 |

Geometry optimization by employing HSE06 hybrid functional (single  $\Gamma$  points)

g-C3N4/MoS2 nanocomposite

POSCAR

Mo S C N

|           |          |           |  |
|-----------|----------|-----------|--|
| 1.000000  |          |           |  |
| 9.570000  | 0.000000 | 0.000000  |  |
| -4.785000 | 8.287863 | 0.000000  |  |
| 0.000000  | 0.000000 | 20.000000 |  |

9 18 12 16

Direct

|          |          |          |
|----------|----------|----------|
| 0.222205 | 0.111097 | 0.336870 |
| 0.555489 | 0.110979 | 0.337503 |
| 0.888899 | 0.111101 | 0.336865 |
| 0.222250 | 0.444496 | 0.337380 |
| 0.555489 | 0.444512 | 0.337510 |
| 0.889023 | 0.444511 | 0.337503 |
| 0.222255 | 0.777745 | 0.337380 |
| 0.555504 | 0.777750 | 0.337380 |
| 0.888904 | 0.777796 | 0.336870 |
| 0.111361 | 0.222712 | 0.260139 |
| 0.110804 | 0.221646 | 0.413482 |
| 0.445069 | 0.222539 | 0.260469 |
| 0.444028 | 0.222010 | 0.414214 |
| 0.777467 | 0.222534 | 0.260465 |
| 0.777990 | 0.222011 | 0.414206 |
| 0.111092 | 0.555541 | 0.260562 |
| 0.111309 | 0.555651 | 0.414474 |
| 0.444457 | 0.555543 | 0.260566 |
| 0.444344 | 0.555657 | 0.414482 |
| 0.777462 | 0.554932 | 0.260469 |
| 0.777991 | 0.555972 | 0.414213 |
| 0.111369 | 0.888632 | 0.260141 |
| 0.110833 | 0.889168 | 0.413485 |
| 0.444460 | 0.888909 | 0.260562 |
| 0.444349 | 0.888692 | 0.414474 |
| 0.777288 | 0.888639 | 0.260139 |
| 0.778355 | 0.889197 | 0.413482 |
| 0.179041 | 0.089523 | 0.566328 |
| 0.410892 | 0.088000 | 0.586628 |
| 0.410897 | 0.322889 | 0.586623 |
| 0.176234 | 0.588116 | 0.595415 |
| 0.411884 | 0.588111 | 0.595415 |
| 0.411885 | 0.823767 | 0.595412 |

|          |          |          |
|----------|----------|----------|
| 0.677106 | 0.589109 | 0.586624 |
| 0.911992 | 0.589098 | 0.586631 |
| 0.910482 | 0.820962 | 0.566328 |
| 0.677103 | 0.088006 | 0.586623 |
| 0.910479 | 0.089532 | 0.566329 |
| 0.911993 | 0.322900 | 0.586624 |
| 0.999999 | 0.000008 | 0.563525 |
| 0.257386 | 0.249762 | 0.567237 |
| 0.257378 | 0.007620 | 0.567254 |
| 0.486698 | 0.243351 | 0.603761 |
| 0.999811 | 0.499906 | 0.590232 |
| 0.251992 | 0.748004 | 0.596797 |
| 0.251984 | 0.503973 | 0.596807 |
| 0.496014 | 0.748004 | 0.596803 |
| 0.500090 | 0.499904 | 0.590230 |
| 0.750238 | 0.742620 | 0.567238 |
| 0.756648 | 0.513308 | 0.603763 |
| 0.992376 | 0.742620 | 0.567250 |
| 0.500095 | 0.000189 | 0.590230 |
| 0.756645 | 0.243356 | 0.603755 |
| 0.750234 | 0.007625 | 0.567242 |
| 0.992375 | 0.249771 | 0.567246 |
